# Supplementary material
Source: PubMed Central journal article supplement (PMC7964862)
Supplement: 15-00200.pdf [file 15-00200.pdf]

**On-line Table 1:** MRI classification of cavernomas as proposed by Mottolese et al<sup>4</sup>

| Lesion Type | Morphologic Characteristics (CT/MR)                                                                                                                                                                                              | Signal Characteristics                                                                                                                                                                                                 | Comments                                                                                                                                                                                                                                                                                          |
|-------------|----------------------------------------------------------------------------------------------------------------------------------------------------------------------------------------------------------------------------------|------------------------------------------------------------------------------------------------------------------------------------------------------------------------------------------------------------------------|---------------------------------------------------------------------------------------------------------------------------------------------------------------------------------------------------------------------------------------------------------------------------------------------------|
| Type IA     | Large spheric lesion with sharp and regular margins with or without apparent encapsulation; sessile bell clapper-like inner structure of distinct attenuation or signal visible in most cases; perilesional edema may be present | Acute stage: acute hematoma-like signal of the main part (T1 isointense and T2 hypointense); subacute stage: T1 hyperintense, variable on T2, T2-hypointense thin peripheral rim of hemosiderin<br>The same as type IA | Cavernomas with recent overt hemorrhage, usually presenting with acute symptoms (cephalgia, seizure, focal neurologic deficits); most are lobar supratentorial                                                                                                                                    |
| Type IB     | The same as type IA, without inner or outer visible cavernomas                                                                                                                                                                   |                                                                                                                                                                                                                        | Cavernomas with overt recent hemorrhage and acute symptoms; most are brain stem or deep supratentorial; hemorrhagic metastases; may be of similar appearance but usually occur in children with a history of malignancy<br>Corresponds to Zabramski type I lesion; variable clinical presentation |
| Type IIA    | Small (1–2.5 cm) lesion with $\geq 1$ centimetric cores                                                                                                                                                                          | Cores: T1 hyperintense, T2/T2* hypointense peripheral parenchymal rim of hemosiderin                                                                                                                                   | Asymptomatic or associated with epilepsy; frequent in adults and uncommon in children; corresponds to Zabramski type II lesion                                                                                                                                                                    |
| Type IIB    | Small (1–2.5 cm) lesion with reticulated core                                                                                                                                                                                    | Core made of T1 and T2-hyperintense points, surrounded by a T2-hypointense rim                                                                                                                                         | May be asymptomatic even when very large                                                                                                                                                                                                                                                          |
| Type IIIA   | Large lesion with macroscopic cysts and huge calcifications                                                                                                                                                                      | Heterogeneous signal with cysts of water-like signal and T2- and T2*- hypointense areas reflecting hemosiderin parenchymal staining or huge calcifications                                                             |                                                                                                                                                                                                                                                                                                   |
| Type IIIB   | Purely cystic (uni- or multiloculated)                                                                                                                                                                                           | Content of waterlike signal on T1 and T2; no T2 hypointense rim; subtle or evident T2* hypointense rim                                                                                                                 | May be misleading with cystic tumors if T2*; GE sequence is not performed                                                                                                                                                                                                                         |
| Type IIIC   | Large solid, round, or ovoid lesion; regular, well-demarcated boundaries more visible on MRI than on CT; peripheral edema may be present                                                                                         | Heterogeneous inner signal on T1 and T2; peripheral T2* hypointense rim                                                                                                                                                | May be misleading with a high-grade tumor on CT or MRI if T2*; GE sequence is not performed                                                                                                                                                                                                       |
| Type IV     | Size $\geq 1$ cm                                                                                                                                                                                                                 | Not visible on T1; homogeneous T2; hypointense; best seen on T2* GE                                                                                                                                                    | Mainly encountered in multiple and/or familial forms; most are asymptomatic; corresponds to Zabramski type IV lesions                                                                                                                                                                             |

**On-line Table 2: Cross-tabulation illustrating initial clinical symptoms of all children, excluding 2 patients with an isolated headache**

|             | No ICP | ICP |
|-------------|--------|-----|
| No seizures |        |     |
| No FND      | 7      | 11  |
| FND         | 9      | 11  |
| Seizures    |        |     |
| No FND      | 13     | 11  |
| FND         | 5      | 1   |

**Note:**—FND indicates focal neurologic deficits; ICP, signs of a raised intracranial pressure.

**On-line Table 3: Cross-tabulation comparing short-term and long-term hemorrhage rates among cavernoma types<sup>a</sup>**

| Type | I                           |                              | II                          |                             | III                       |                           | IV                          |                            |
|------|-----------------------------|------------------------------|-----------------------------|-----------------------------|---------------------------|---------------------------|-----------------------------|----------------------------|
|      | Breslow                     | Log-Rank                     | Breslow                     | Log-Rank                    | Breslow                   | Log-Rank                  | Breslow                     | Log-Rank                   |
| II   | 1.210 (.271)                | 1.338 (.247)                 |                             |                             |                           |                           |                             |                            |
| III  | 24.142 (<.001) <sup>b</sup> | 36.096 (<.001) <sup>b</sup>  | 2.260 (.133)                | 5.374 (.020) <sup>b</sup>   |                           |                           |                             |                            |
| IV   | 84.843 (<.001) <sup>b</sup> | 106.462 (<.001) <sup>b</sup> | 20.222 (<.001) <sup>b</sup> | 35.191 (<.001) <sup>b</sup> | 5.923 (.015) <sup>b</sup> | 6.017 (.014) <sup>b</sup> |                             |                            |
| V    | 0.167 (.683)                | 1.295 (.255)                 | 0.146 (.703)                | 0.182 (.670)                | 7.591 (.006) <sup>b</sup> | 4.049 (.044) <sup>b</sup> | 26.999 (<.001) <sup>b</sup> | 10.565 (.001) <sup>b</sup> |

<sup>a</sup>  $\chi^2$  values and respective *P* values (in parentheses) for the Breslow test (Generalized Wilcoxon) and the log-rank test (Mantel-Cox).

<sup>b</sup> Significant *P* value.
